# Supplementary material
Source: PubMed Central journal article supplement (PMC3795110)
Supplement: SD3.pdf [file SD3.pdf]

SUPPLEMENTAL TABLE 1  
Uncorrected pairwise interspecific divergences (%) for each gene fragment\*

| A: 16S   |      |            |      |      |      |      |      |      |            |      |      |            |      |      |      |      |      |      |      |      |      |
|----------|------|------------|------|------|------|------|------|------|------------|------|------|------------|------|------|------|------|------|------|------|------|------|
| (256bp)  | 1    | 2          | 3    | 4    | 5    | 6    | 7    | 8    | 9          | 10   | 11   | 12         | 13   | 14   | 15   | 16   | 17   | 18   | 19   | 20   | 21   |
| 1: Tbar  |      |            |      |      |      |      |      |      |            |      |      |            |      |      |      |      |      |      |      |      |      |
| 2: Tbra  | 4.4  |            |      |      |      |      |      |      |            |      |      |            |      |      |      |      |      |      |      |      |      |
| 3: Tcar  | 3.6  | 5.2        |      |      |      |      |      |      |            |      |      |            |      |      |      |      |      |      |      |      |      |
| 4: Tcir  | 4.0  | 4.8        | 1.2  |      |      |      |      |      |            |      |      |            |      |      |      |      |      |      |      |      |      |
| 5: Tcos  | 3.2  | 5.2        | 4.8  | 5.2  |      |      |      |      |            |      |      |            |      |      |      |      |      |      |      |      |      |
| 6: Tgar  | 4.4  | <b>8.7</b> | 7.9  | 8.3  | 6.7  |      |      |      |            |      |      |            |      |      |      |      |      |      |      |      |      |
| 7: Tguas | 4.8  | 5.2        | 2.4  | 2.0  | 5.2  | 8.3  |      |      |            |      |      |            |      |      |      |      |      |      |      |      |      |
| 8: Tguaz | 1.2  | 4.0        | 4.0  | 4.4  | 3.2  | 4.8  | 4.4  |      |            |      |      |            |      |      |      |      |      |      |      |      |      |
| 9: Tinf  | 4.8  | 6.0        | 5.6  | 6.0  | 6.0  | 7.9  | 6.0  | 5.2  |            |      |      |            |      |      |      |      |      |      |      |      |      |
| 10: Tjua | 4.4  | 7.9        | 6.3  | 6.7  | 6.3  | 3.2  | 7.5  | 4.8  | 7.9        |      |      |            |      |      |      |      |      |      |      |      |      |
| 11: Tklu | 3.6  | 5.2        | 1.2  | 1.6  | 4.0  | 7.9  | 2.0  | 4.0  | 6.0        | 6.3  |      |            |      |      |      |      |      |      |      |      |      |
| 12: Tmac | 3.6  | 6.3        | 6.3  | 6.7  | 5.2  | 7.5  | 7.5  | 4.8  | 6.0        | 7.5  | 5.6  |            |      |      |      |      |      |      |      |      |      |
| 13: Tmat | 4.4  | 7.9        | 6.3  | 6.7  | 7.1  | 2.4  | 6.7  | 4.8  | 7.5        | 1.6  | 6.3  | 7.5        |      |      |      |      |      |      |      |      |      |
| 14: Tpat | 4.0  | 5.2        | 2.8  | 2.4  | 6.0  | 8.3  | 3.6  | 4.4  | 7.1        | 7.5  | 3.2  | 6.0        | 7.5  |      |      |      |      |      |      |      |      |
| 15: Tpse | 3.2  | 6.0        | 6.0  | 6.3  | 4.8  | 7.1  | 7.1  | 4.4  | 5.6        | 7.1  | 5.2  | <b>0.4</b> | 7.1  | 5.6  |      |      |      |      |      |      |      |
| 16: Trub | 3.6  | 4.8        | 1.6  | 2.0  | 5.6  | 7.9  | 2.4  | 3.2  | 5.6        | 6.3  | 2.0  | 6.3        | 6.3  | 3.6  | 6.0  |      |      |      |      |      |      |
| 17: Tshe | 4.0  | 1.2        | 6.0  | 5.6  | 4.8  | 8.3  | 6.0  | 4.4  | 6.3        | 8.3  | 5.2  | 5.2        | 8.3  | 5.6  | 4.8  | 5.6  |      |      |      |      |      |
| 18: Tsor | 4.4  | 7.1        | 7.1  | 7.5  | 7.1  | 2.8  | 8.3  | 4.0  | <b>8.7</b> | 3.6  | 7.1  | 7.5        | 2.8  | 7.5  | 7.1  | 6.3  | 7.5  |      |      |      |      |
| 19: Tvan | 4.0  | 7.5        | 6.0  | 6.3  | 6.7  | 2.8  | 7.1  | 4.4  | 7.5        | 1.2  | 6.0  | 7.1        | 1.2  | 7.1  | 6.7  | 6.0  | 7.9  | 2.4  |      |      |      |
| 20: Twil | 1.6  | 4.0        | 3.6  | 4.0  | 3.6  | 6.0  | 4.8  | 1.2  | 6.0        | 5.2  | 3.6  | 4.4        | 5.2  | 4.8  | 4.0  | 2.8  | 4.8  | 4.4  | 4.8  |      |      |
| 21: Pmeg | 11.1 | 10.7       | 12.3 | 11.9 | 12.3 | 14.3 | 11.5 | 12.3 | 12.3       | 13.5 | 12.3 | 10.7       | 12.7 | 11.5 | 10.3 | 12.7 | 11.1 | 14.7 | 13.1 | 11.5 |      |
| 22: Rpro | 17.9 | 19.4       | 19.4 | 20.2 | 17.9 | 19.4 | 19.8 | 17.9 | 18.7       | 20.6 | 19.4 | 18.7       | 20.2 | 19.8 | 18.3 | 19.8 | 19.8 | 21.0 | 20.2 | 17.9 | 21.0 |

  

| B: Cytb  |      |      |      |      |      |      |      |      |            |      |      |      |      |             |      |      |      |  |  |  |
|----------|------|------|------|------|------|------|------|------|------------|------|------|------|------|-------------|------|------|------|--|--|--|
| (313 bp) | 1    | 2    | 3    | 4    | 5    | 6    | 7    | 8    | 9          | 10   | 11   | 12   | 13   | 14          | 15   | 16   | 17   |  |  |  |
| 1: Tbar  |      |      |      |      |      |      |      |      |            |      |      |      |      |             |      |      |      |  |  |  |
| 2: Tbra  | 17.6 |      |      |      |      |      |      |      |            |      |      |      |      |             |      |      |      |  |  |  |
| 3: Tcos  | 14.3 | 18.4 |      |      |      |      |      |      |            |      |      |      |      |             |      |      |      |  |  |  |
| 4: Tguas | 12.5 | 14.7 | 13.6 |      |      |      |      |      |            |      |      |      |      |             |      |      |      |  |  |  |
| 5: Tguaz | 11.8 | 16.2 | 14.7 | 12.9 |      |      |      |      |            |      |      |      |      |             |      |      |      |  |  |  |
| 6: Tinf  | 18.8 | 14.0 | 15.8 | 16.9 | 15.8 |      |      |      |            |      |      |      |      |             |      |      |      |  |  |  |
| 7: Tjua  | 17.6 | 8.1  | 17.3 | 14.3 | 16.5 | 16.2 |      |      |            |      |      |      |      |             |      |      |      |  |  |  |
| 8: Tklu  | 15.8 | 16.2 | 15.1 | 12.5 | 10.7 | 12.9 | 16.2 |      |            |      |      |      |      |             |      |      |      |  |  |  |
| 9: Tmac  | 14.3 | 15.1 | 17.3 | 15.1 | 12.5 | 15.4 | 15.4 | 12.1 |            |      |      |      |      |             |      |      |      |  |  |  |
| 10: Tmat | 14.3 | 16.2 | 16.2 | 4.8  | 13.6 | 17.6 | 14.0 | 12.5 | 14.3       |      |      |      |      |             |      |      |      |  |  |  |
| 11: Tmel | 16.5 | 9.6  | 16.5 | 14.3 | 16.9 | 13.2 | 11.0 | 15.1 | 14.3       | 15.4 |      |      |      |             |      |      |      |  |  |  |
| 12: Tpse | 14.3 | 14.3 | 16.5 | 14.3 | 12.5 | 14.7 | 14.7 | 11.4 | <b>0.7</b> | 13.6 | 13.6 |      |      |             |      |      |      |  |  |  |
| 13: Trub | 14.3 | 16.5 | 15.1 | 12.5 | 10.7 | 13.2 | 15.8 | 2.6  | 12.9       | 12.5 | 14.7 | 12.1 |      |             |      |      |      |  |  |  |
| 14: Tsh  | 14.7 | 12.5 | 18.0 | 17.3 | 17.3 | 16.9 | 11.8 | 18.8 | 16.5       | 18.0 | 9.9  | 16.5 | 18.4 |             |      |      |      |  |  |  |
| 15: Tsor | 14.0 | 19.1 | 18.0 | 7.7  | 13.2 | 19.5 | 17.3 | 14.3 | 15.8       | 8.1  | 18.4 | 15.1 | 14.3 | <b>21.3</b> |      |      |      |  |  |  |
| 16: Twil | 11.4 | 16.5 | 14.3 | 12.5 | 1.1  | 15.4 | 16.9 | 10.3 | 12.9       | 12.5 | 17.3 | 12.1 | 10.3 | 18.4        | 12.1 |      |      |  |  |  |
| 17: Pmeg | 21.3 | 20.2 | 22.1 | 21.7 | 18.8 | 19.1 | 19.5 | 20.6 | 18.8       | 21.0 | 22.4 | 18.0 | 19.9 | 22.4        | 19.9 | 17.6 |      |  |  |  |
| 18: Rpro | 18.8 | 21.0 | 22.1 | 21.3 | 17.6 | 18.0 | 21.0 | 20.2 | 18.4       | 21.7 | 22.8 | 17.6 | 18.4 | 21.3        | 22.1 | 17.3 | 21.3 |  |  |  |

  

| C: COI   |      |      |      |      |      |            |             |      |      |      |      |      |      |      |      |      |
|----------|------|------|------|------|------|------------|-------------|------|------|------|------|------|------|------|------|------|
| (202 bp) | 1    | 2    | 3    | 4    | 5    | 6          | 7           | 8    | 9    | 10   | 11   | 12   | 13   | 14   | 15   | 16   |
| 1: Tbar  |      |      |      |      |      |            |             |      |      |      |      |      |      |      |      |      |
| 2: Tcar  | 13.7 |      |      |      |      |            |             |      |      |      |      |      |      |      |      |      |
| 3: Tcir  | 15.0 | 3.1  |      |      |      |            |             |      |      |      |      |      |      |      |      |      |
| 4: Tcos  | 20.9 | 14.7 | 13.4 |      |      |            |             |      |      |      |      |      |      |      |      |      |
| 5: Tguas | 16.8 | 8.5  | 7.4  | 13.3 |      |            |             |      |      |      |      |      |      |      |      |      |
| 6: Tguaz | 11.9 | 8.6  | 8.6  | 13.4 | 10.3 |            |             |      |      |      |      |      |      |      |      |      |
| 7: Tinf  | 20.1 | 14.8 | 14.8 | 16.7 | 18.6 | 17.4       |             |      |      |      |      |      |      |      |      |      |
| 8: Tmac  | 17.3 | 18.7 | 20.0 | 19.9 | 17.4 | 19.3       | 23.6        |      |      |      |      |      |      |      |      |      |
| 9: Tmat  | 19.4 | 15.1 | 13.2 | 16.9 | 11.3 | 13.8       | 25.8        | 17.4 |      |      |      |      |      |      |      |      |
| 10: Tpse | 16.9 | 8.6  | 10.4 | 12.1 | 14.0 | 11.0       | 14.9        | 20.8 | 18.5 |      |      |      |      |      |      |      |
| 11: Trub | 11.9 | 3.6  | 2.5  | 14.1 | 9.1  | 9.2        | 15.4        | 18.7 | 13.8 | 9.8  |      |      |      |      |      |      |
| 12: Tshe | 7.4  | 16.2 | 16.2 | 20.9 | 16.8 | 16.9       | 18.7        | 20.0 | 20.7 | 18.2 | 14.3 |      |      |      |      |      |
| 13: Tsor | 17.4 | 13.2 | 11.4 | 19.1 | 12.0 | 13.2       | <b>22.9</b> | 15.5 | 5.7  | 14.6 | 12.0 | 18.7 |      |      |      |      |
| 14: Tvan | 14.9 | 11.0 | 7.4  | 11.5 | 10.4 | 7.4        | 16.0        | 19.4 | 12.0 | 10.3 | 8.0  | 16.2 | 11.4 |      |      |      |
| 15: Twil | 13.7 | 9.2  | 8.0  | 14.1 | 9.7  | <b>1.5</b> | 18.0        | 19.3 | 14.5 | 10.4 | 8.6  | 18.9 | 12.6 | 6.9  |      |      |
| 16: Pmeg | 22.4 | 21.1 | 20.4 | 21.1 | 17.8 | 23.1       | 22.4        | 14.8 | 20.4 | 20.4 | 20.4 | 22.5 | 19.8 | 18.5 | 21.1 |      |
| 17: Rpro | 25.1 | 26.4 | 25.7 | 29.4 | 24.4 | 25.0       | 23.1        | 27.4 | 28.0 | 27.9 | 25.0 | 25.9 | 25.1 | 26.5 | 25.0 | 22.4 |

\*P-distances mentioned in the text are in bold.  
Tbar = *Triatoma baratai*; Tbra = *T. braziliensis*; Tcar = *T. carvalhoi*; Tcir = *T. circummaculata*; Tcos = *T. costalimai*; Tgar = *T. garciabesi*; Tguas = *T. guasayana*; Tguaz = *T. guazu*; Tinf = *T. infestans*; Tjua = *T. juazeirensis*; Tklu = *T. klugi*; Tmac = *T. maculata*; Tmat = *T. matogrossensis*; Tpat = *T. patagonica*; Tpse = *T. pseudomaculata*; Trub = *T. rubrovaria*; Tshe = *T. sherlocki*; Tsor = *T. sordida*; Tvan = *T. vanda*; Twil = *T. williamsi*; Pmeg = *Panstrongylus megistus*; Rpro = *Rhodnius prolixus*.
